# Supplementary material
Source: publisher figshare collection journal article supplement (https://karger.figshare.com/articles/dataset/_/28803692)
Supplement: Supplementary file 1 [file 1]

**Supplementary Table 2 Incidence and Prevalence of ADOD in 2021, and percentage change in ASIR and ASPR globally and by seven GBD super-regions, 21 GBD regions, and 204 countries or territories**

|  | **Incidence of ADOD** | | | | **Prevalence of ADOD** | | | |
| --- | --- | --- | --- | --- | --- | --- | --- | --- |
|  | **2021 cases** | **2021 All-age incidence rate per 100 000** | **2021 ASIR per 100 000** | **Percent change of ASIR 1990-2021** | **2021 cases** | **2021 All-age prevalence rate per 100 000** | **2021ASPR per 100 000** | **Percent change of ASPR 1990-2021** |
| **Global** | **9837055.84 (8620519.2 to 11163699.62)** | **124.66 (109.24 to 141.47)** | **119.76 (104.96 to 135.89)** | **0.02 (0.01 to 0.03)** | **56856688.21 (49382064.01 to 64977511.92)** | **720.49 (625.77 to 823.4)** | **694.01 (602.88 to 794.08)** | **0.03 (0.02 to 0.04)** |
| **Central Europe, eastern Europe, and central Asia** | **755536.82 (656394.22 to 865129.42)** | **180.82 (157.1 to 207.05)** | **113.88 (99.4 to 129.98)** | **-0.02 (-0.03 to -0.01)** | **4320251.28 (3735256.99 to 4943394.1)** | **1033.97 (893.96 to 1183.11)** | **649.03 (563.35 to 740.33)** | **-0.02 (-0.03 to -0.01)** |
| **Central Asia** | 69754.83 (61205.22 to 79094.11) | 72.81 (63.88 to 82.55) | 109.82 (95.87 to 125.3) | -0.02 (-0.03 to 0) | 398791.49 (345208.76 to 451918.05) | 416.24 (360.31 to 471.69) | 626.81 (541.85 to 713.52) | -0.02 (-0.03 to 0) |
| Armenia | 4929.91 (4260.42 to 5654.93) | 164.59 (142.24 to 188.79) | 114 (99.56 to 130.25) | 0 (-0.04 to 0.03) | 28418.45 (24401.79 to 32441.15) | 948.77 (814.67 to 1083.08) | 651.84 (563.19 to 741.68) | 1.21 (1.11 to 1.3) |
| Azerbaijan | 8310.56 (7217.67 to 9441.39) | 79.15 (68.74 to 89.92) | 110.27 (96.65 to 126.18) | -0.03 (-0.06 to 0.01) | 47756.55 (41315.02 to 54593.82) | 454.82 (393.47 to 519.93) | 629.51 (541.15 to 721.59) | 0.25 (0.2 to 0.3) |
| Georgia | 7575.89 (6602.85 to 8610.61) | 210.02 (183.04 to 238.7) | 113.98 (99.53 to 129.49) | 0 (-0.03 to 0.03) | 43614.77 (37828.24 to 49552.96) | 1209.07 (1048.66 to 1373.69) | 651.46 (562.89 to 743.97) | 0.82 (0.74 to 0.9) |
| Kazakhstan | 15444.17 (13387.44 to 17641.51) | 81.48 (70.63 to 93.07) | 111.1 (96.76 to 126.81) | -0.02 (-0.06 to 0.01) | 87907.5 (75725.79 to 100517.4) | 463.76 (399.49 to 530.28) | 634.04 (542.82 to 724.42) | 0.12 (0.07 to 0.17) |
| Kyrgyzstan | 4133.92 (3622.13 to 4676.3) | 60.23 (52.78 to 68.14) | 113.88 (99.39 to 130.07) | 0.01 (-0.03 to 0.05) | 23636.62 (20391.15 to 26813.27) | 344.4 (297.11 to 390.69) | 649.99 (562.04 to 741.22) | -0.08 (-0.12 to -0.04) |
| Mongolia | 1818.69 (1598.74 to 2051.13) | 54.51 (47.92 to 61.48) | 115.83 (101.21 to 132.52) | 0.01 (-0.02 to 0.05) | 10277.34 (8905.15 to 11612.55) | 308.05 (266.92 to 348.07) | 660.02 (573.53 to 749.23) | 0.24 (0.18 to 0.29) |
| Tajikistan | 4156.95 (3626.39 to 4715.46) | 40.92 (35.69 to 46.41) | 104.98 (92.03 to 120.4) | -0.06 (-0.1 to -0.03) | 23728.99 (20337.59 to 27181.95) | 233.55 (200.17 to 267.54) | 597.35 (515.42 to 684.84) | -0.16 (-0.2 to -0.12) |
| Turkmenistan | 3296.35 (2868.75 to 3740.67) | 63.9 (55.61 to 72.52) | 107.05 (93.39 to 122.99) | -0.05 (-0.08 to -0.02) | 18834.14 (16188.27 to 21359.69) | 365.12 (313.83 to 414.08) | 609.86 (523.2 to 698.24) | 0.45 (0.38 to 0.5) |
| Uzbekistan | 20088.39 (17466.67 to 22884.89) | 58.68 (51.02 to 66.85) | 106.19 (92.22 to 122.08) | 0 (-0.04 to 0.03) | 114617.14 (98143.44 to 130046.71) | 334.82 (286.69 to 379.89) | 605.59 (519.15 to 691.73) | 0.1 (0.05 to 0.16) |
| **Central Europe** | 269693.15 (233101.96 to 309820.37) | 233.98 (202.23 to 268.79) | 112.42 (97.97 to 128.46) | -0.02 (-0.03 to -0.01) | 1540943.57 (1327847.79 to 1766514.26) | 1336.88 (1152.01 to 1532.58) | 641.22 (554.05 to 732.31) | -0.02 (-0.04 to -0.01) |
| Albania | 4828.2 (4173.98 to 5529.35) | 180.98 (156.45 to 207.26) | 112.62 (98 to 128.7) | 0.01 (-0.03 to 0.04) | 27825.66 (23946.33 to 32078.57) | 1042.99 (897.59 to 1202.41) | 648.77 (562.35 to 743.87) | 2.25 (2.12 to 2.37) |
| Bosnia and Herzegovina | 7139.76 (6148.33 to 8274.95) | 216.17 (186.15 to 250.54) | 111.79 (96.79 to 127.27) | 0 (-0.03 to 0.03) | 41105.32 (35021.24 to 47373.74) | 1244.54 (1060.33 to 1434.32) | 641.05 (550.88 to 735.26) | 1.77 (1.65 to 1.91) |
| Bulgaria | 17298.96 (14847.65 to 20198.13) | 254.89 (218.77 to 297.6) | 112.43 (97.8 to 128.73) | -0.02 (-0.05 to 0.01) | 98848.15 (84426.6 to 114513.01) | 1456.45 (1243.96 to 1687.26) | 643.45 (553.32 to 739.68) | 0.91 (0.79 to 1.03) |
| Croatia | 11298.72 (9711.33 to 12992.76) | 268.46 (230.75 to 308.72) | 112.67 (98.23 to 128.39) | -0.03 (-0.06 to 0) | 65214.81 (55711.6 to 75361.81) | 1549.55 (1323.74 to 1790.65) | 647.44 (556.18 to 745.36) | 1.14 (1.04 to 1.23) |
| Czechia | 26326.7 (22779.12 to 30304.72) | 247.61 (214.24 to 285.02) | 111.23 (96.31 to 127.59) | -0.01 (-0.04 to 0.03) | 150648.73 (129274.24 to 172467.74) | 1416.89 (1215.85 to 1622.1) | 638.18 (547.88 to 727.68) | 0.69 (0.61 to 0.78) |
| Hungary | 24330.61 (21064.59 to 27869.46) | 253.51 (219.48 to 290.39) | 111.47 (96.69 to 127.63) | -0.01 (-0.04 to 0.02) | 139417.25 (119696.94 to 159963.22) | 1452.67 (1247.19 to 1666.75) | 638.1 (548.27 to 732.18) | 0.69 (0.61 to 0.77) |
| Montenegro | 1006.48 (862.69 to 1162.79) | 162.84 (139.58 to 188.13) | 111.66 (97.13 to 128.15) | -0.03 (-0.05 to 0) | 5755.24 (4891.28 to 6610.14) | 931.18 (791.39 to 1069.5) | 639.32 (547.61 to 729.15) | 0.56 (0.5 to 0.61) |
| North Macedonia | 3033.48 (2587.16 to 3531.87) | 139.38 (118.87 to 162.28) | 111.12 (96.41 to 127.65) | -0.01 (-0.04 to 0.03) | 17226.55 (14557.45 to 19883.69) | 791.5 (668.87 to 913.59) | 636.56 (546.06 to 726.34) | 0.57 (0.49 to 0.66) |
| Poland | 88407.3 (76685.21 to 101187.19) | 231.2 (200.54 to 264.62) | 114.27 (99.44 to 130.4) | -0.05 (-0.06 to -0.04) | 501491.62 (432862.64 to 576739.81) | 1311.49 (1132.01 to 1508.27) | 645.55 (558.48 to 741.84) | 0.82 (0.77 to 0.88) |
| Romania | 46175.04 (39787.83 to 53463.72) | 243.81 (210.09 to 282.3) | 111.32 (96.82 to 127.73) | 0 (-0.03 to 0.04) | 265106.7 (226934.13 to 304833.12) | 1399.83 (1198.27 to 1609.59) | 637.2 (547.1 to 729.32) | 1.17 (1.05 to 1.32) |
| Serbia | 19542.53 (16949.22 to 22542.75) | 219.1 (190.02 to 252.74) | 111.65 (96.91 to 128.06) | 0 (-0.03 to 0.04) | 111693.9 (95436.24 to 128375.35) | 1252.24 (1069.97 to 1439.26) | 638.51 (545.56 to 731.1) | 1.17 (1.07 to 1.28) |
| Slovakia | 10646.47 (9281.27 to 12234.19) | 196.09 (170.94 to 225.33) | 110.87 (97.08 to 127) | -0.02 (-0.05 to 0.02) | 60989.61 (52451.93 to 70396.63) | 1123.31 (966.06 to 1296.57) | 635.02 (547.19 to 728.34) | 0.63 (0.57 to 0.7) |
| Slovenia | 5733.44 (4980.99 to 6581.8) | 277.02 (240.67 to 318.02) | 110.51 (96.63 to 126.67) | 0 (-0.03 to 0.04) | 33191.07 (28403.09 to 38235.22) | 1603.7 (1372.36 to 1847.42) | 635.78 (543.67 to 726.69) | 1.06 (0.97 to 1.17) |
| **Eastern Europe** | 416088.85 (361581.06 to 476873.86) | 201.24 (174.88 to 230.64) | 115.66 (100.94 to 131.87) | -0.01 (-0.03 to 0) | 2380516.22 (2059571.31 to 2730951.12) | 1151.35 (996.12 to 1320.84) | 658.68 (571.31 to 752.67) | -0.02 (-0.03 to 0) |
| Belarus | 19115.13 (16467.46 to 21916.61) | 205 (176.6 to 235.04) | 116.35 (101.03 to 133.43) | 0 (-0.04 to 0.04) | 110570.99 (95061.81 to 127555.85) | 1185.79 (1019.47 to 1367.94) | 668.51 (574.81 to 769.2) | 0.5 (0.44 to 0.57) |
| Estonia | 3662.14 (3185.42 to 4204.35) | 279.37 (243.01 to 320.74) | 112.78 (98.89 to 128.28) | -0.01 (-0.04 to 0.03) | 21191.9 (18135.65 to 24367.09) | 1616.67 (1383.52 to 1858.9) | 648.82 (559.06 to 741.98) | 0.94 (0.83 to 1.04) |
| Latvia | 5466.94 (4733.01 to 6277.08) | 292.3 (253.06 to 335.61) | 114.97 (99.97 to 131) | 0 (-0.03 to 0.04) | 31568.55 (27024.27 to 36438.6) | 1687.86 (1444.89 to 1948.25) | 660.59 (570.4 to 758.14) | 0.92 (0.84 to 1.03) |
| Lithuania | 7770.76 (6693.97 to 9018.17) | 284.82 (245.35 to 330.54) | 112.73 (98.22 to 129.2) | 0 (-0.03 to 0.03) | 44997.94 (38723.86 to 51798.8) | 1649.3 (1419.34 to 1898.57) | 648.52 (560.43 to 740.2) | 1.07 (0.98 to 1.17) |
| Moldova | 6801.07 (5910.45 to 7735.71) | 189.26 (164.48 to 215.27) | 111.97 (97.12 to 128.21) | 0.01 (-0.02 to 0.05) | 39085.71 (33367.96 to 44619.8) | 1087.69 (928.58 to 1241.7) | 640.52 (549.24 to 730.71) | 1.2 (1.09 to 1.32) |
| Russia | 279805.53 (243531.01 to 319868.9) | 193.16 (168.12 to 220.82) | 115.89 (101.23 to 131.98) | -0.01 (-0.02 to 0) | 1605863.01 (1392754.76 to 1846535.8) | 1108.61 (961.49 to 1274.76) | 661.42 (573.18 to 758.61) | 0.6 (0.55 to 0.65) |
| Ukraine | 93467.28 (80738.11 to 107939.84) | 216.97 (187.42 to 250.57) | 115.57 (100.64 to 132.68) | -0.03 (-0.06 to 0) | 527238.11 (453770.08 to 609727.95) | 1223.92 (1053.37 to 1415.41) | 651.18 (564.01 to 749.5) | 0.47 (0.4 to 0.54) |
| **High income** | **3144434.67 (2756346.23 to 3576665.04)** | **288.04 (252.49 to 327.63)** | **121.63 (106.51 to 137.49)** | **-0.04 (-0.06 to -0.02)** | **18274827.8 (15907237.69 to 20718738.45)** | **1674.03 (1457.15 to 1897.9)** | **700.89 (612.26 to 797.39)** | **-0.03 (-0.05 to -0.01)** |
| **Australasia** | **63288.53 (55457.11 to 71346.59)** | **204.41 (179.12 to 230.44)** | **105.44 (92.56 to 118.63)** | **-0.15 (-0.2 to -0.1)** | **363506.82 (317552.63 to 409187.56)** | **1174.06 (1025.64 to 1321.6)** | **604.41 (526.77 to 679.94)** | **-0.15 (-0.19 to -0.10)** |
| Australia | 52191.14 (45953.71 to 58771.58) | 202.35 (178.17 to 227.87) | 102.66 (90.27 to 115.36) | -0.16 (-0.22 to -0.11) | 300594.01 (262039.77 to 338693.04) | 1165.46 (1015.98 to 1313.17) | 589.93 (513.23 to 663.34) | 0.48 (0.39 to 0.58) |
| New Zealand | 11097.39 (9639.18 to 12752.73) | 214.67 (186.46 to 246.69) | 120.84 (104.92 to 138.57) | -0.06 (-0.09 to -0.03) | 62912.81 (54136.66 to 72376.19) | 1217 (1047.23 to 1400.06) | 684.59 (589.02 to 787.91) | 0.49 (0.42 to 0.55) |
| **High-income Asia Pacific** | 701760.5 (614636.07 to 802668.29) | 378.42 (331.44 to 432.83) | 118.62 (103.43 to 135) | 0.01 (0 to 0.03) | 4109524.9 (3547341.6 to 4692562.14) | 2216.02 (1912.87 to 2530.41) | 684.82 (596.97 to 780.11) | 0.04 (0.02 to 0.06) |
| Brunei | 237.25 (204.6 to 272.78) | 52.59 (45.35 to 60.46) | 101.56 (88.37 to 116.86) | 0 (-0.04 to 0.03) | 1331.01 (1141.24 to 1518.95) | 295.04 (252.97 to 336.69) | 578.96 (496.58 to 663.75) | 0.76 (0.67 to 0.85) |
| Japan | 576269.98 (503457.36 to 662793.89) | 451.28 (394.26 to 519.03) | 117.23 (102.05 to 133.68) | 0.01 (0 to 0.03) | 3367357.7 (2893950.69 to 3872083.71) | 2636.98 (2266.26 to 3032.23) | 674.1 (584.78 to 770.24) | 2.24 (2.09 to 2.41) |
| Singapore | 7763.98 (6987.61 to 8584.42) | 135.56 (122.01 to 149.89) | 94.88 (85.54 to 104.85) | 0.04 (-0.01 to 0.1) | 43790.86 (39004.24 to 48432.46) | 764.6 (681.02 to 845.64) | 534.49 (474.45 to 589.82) | 1.65 (1.51 to 1.82) |
| South Korea | 117489.28 (102909.94 to 133126.5) | 227.82 (199.55 to 258.14) | 124.63 (109.44 to 140.89) | -0.02 (-0.08 to 0.03) | 697045.33 (609565.7 to 789738.53) | 1351.64 (1182.01 to 1531.38) | 739.81 (647.7 to 836.31) | 3 (2.77 to 3.24) |
| **High-income North America** | 928259.16 (812567.48 to 1051337.97) | 250.76 (219.51 to 284.01) | 131.39 (114.67 to 149.04) | -0.06 (-0.07 to -0.05) | 5508416.55 (4800045.46 to 6295243.9) | 1488.06 (1296.7 to 1700.62) | 775.11 (673.67 to 885.78) | -0.05 (-0.07 to -0.04) |
| Canada | 105263.87 (93818.75 to 117160.41) | 280.93 (250.39 to 312.68) | 132.4 (118.02 to 147.29) | -0.11 (-0.15 to -0.08) | 631350.31 (556981.4 to 707708.75) | 1684.98 (1486.5 to 1888.77) | 792.31 (701.61 to 888.19) | 0.61 (0.54 to 0.69) |
| Greenland | 69.35 (59.91 to 79.35) | 123.61 (106.79 to 141.45) | 135.63 (117.63 to 156.11) | -0.02 (-0.05 to 0.02) | 400.43 (340.03 to 458.77) | 713.74 (606.09 to 817.74) | 786.97 (673.97 to 906.26) | 1.35 (1.25 to 1.45) |
| USA | 822911.39 (718803.48 to 935111.94) | 247.39 (216.09 to 281.12) | 131.29 (113.93 to 149.6) | -0.05 (-0.07 to -0.04) | 4876579.43 (4231619.97 to 5601213.22) | 1466.01 (1272.12 to 1683.85) | 773.07 (670.26 to 887.66) | 0.36 (0.33 to 0.39) |
| **Southern Latin America** | 98313.16 (85032.14 to 112618) | 145.23 (125.61 to 166.36) | 107.09 (92.9 to 122.43) | -0.04 (-0.07 to -0.02) | 546191.8 (471610.68 to 621961.19) | 806.85 (696.68 to 918.78) | 595.26 (514.48 to 676.41) | -0.04 (-0.07 to -0.02) |
| Argentina | 62824.57 (54326.47 to 72187.65) | 138.11 (119.43 to 158.7) | 106.73 (92.2 to 122.29) | -0.05 (-0.08 to -0.01) | 347969.5 (301069.25 to 398592.39) | 764.98 (661.88 to 876.27) | 592.53 (512.44 to 676.59) | 0.39 (0.33 to 0.45) |
| Chile | 28466.36 (24777.3 to 32535.01) | 151.43 (131.81 to 173.08) | 107.87 (93.91 to 123.11) | -0.02 (-0.06 to 0.03) | 159046.6 (137147.9 to 182056.8) | 846.09 (729.59 to 968.5) | 601.08 (518.53 to 687.09) | 1.12 (1.01 to 1.24) |
| Uruguay | 7016.81 (6124.23 to 8052.51) | 206.04 (179.83 to 236.45) | 107.09 (93.07 to 121.78) | -0.05 (-0.08 to -0.01) | 39145.56 (34066.75 to 44857.16) | 1149.44 (1000.31 to 1317.15) | 595.24 (515.9 to 680.56) | 0.47 (0.4 to 0.55) |
| **Western Europe** | 1352813.32 (1182307.55 to 1543865.98) | 309.29 (270.31 to 352.97) | 118.56 (103.36 to 134.23) | -0.03 (-0.06 to 0) | 7747187.72 (6705229.51 to 8805140.4) | 1771.23 (1533.01 to 2013.11) | 670.36 (583.83 to 762.62) | -0.03 (-0.06 to 0) |
| Andorra | 190.22 (163.6 to 218.21) | 222.23 (191.13 to 254.94) | 114.28 (98.41 to 131.55) | -0.06 (-0.09 to -0.03) | 1085.74 (929.59 to 1244.87) | 1268.48 (1086.06 to 1454.4) | 645.09 (551.71 to 741.3) | 1.03 (0.93 to 1.15) |
| Austria | 25290.6 (21750.76 to 29369.23) | 281.56 (242.15 to 326.97) | 116.09 (99.55 to 133.87) | -0.06 (-0.1 to -0.03) | 143897.79 (122259.29 to 167784.49) | 1602.01 (1361.11 to 1867.94) | 654.27 (558.12 to 755.81) | 0.39 (0.33 to 0.46) |
| Belgium | 34244.74 (29718.87 to 39179.26) | 298.58 (259.12 to 341.6) | 121.59 (105.24 to 139.55) | -0.11 (-0.16 to -0.07) | 198767.07 (169526.64 to 229900.19) | 1733.04 (1478.09 to 2004.49) | 693.78 (598.36 to 799.83) | 0.35 (0.27 to 0.43) |
| Cyprus | 2459.38 (2096.03 to 2871.04) | 181.13 (154.37 to 211.45) | 117.37 (101.52 to 134.87) | -0.04 (-0.07 to 0) | 13693.81 (11595.93 to 15886.47) | 1008.55 (854.04 to 1170.04) | 661.56 (568.54 to 762.23) | 0.75 (0.64 to 0.87) |
| Denmark | 11465.87 (9905.66 to 13147.69) | 195.94 (169.28 to 224.68) | 84.34 (72.78 to 96.21) | -0.18 (-0.22 to -0.14) | 64491.65 (55729.44 to 73639.03) | 1102.09 (952.35 to 1258.4) | 474.71 (409.31 to 539.52) | 0.07 (0.01 to 0.13) |
| Finland | 16662.35 (14213.03 to 19329.49) | 300.99 (256.74 to 349.16) | 108.45 (92.52 to 124.81) | -0.11 (-0.17 to -0.06) | 95435.82 (80330.82 to 109896.41) | 1723.94 (1451.08 to 1985.15) | 616.9 (523.13 to 709.76) | 0.71 (0.58 to 0.8) |
| France | 163141.4 (143062.49 to 184345.27) | 245.73 (215.49 to 277.67) | 93.63 (82.25 to 105.56) | -0.06 (-0.1 to 0) | 924607.01 (807081.33 to 1045108.17) | 1392.69 (1215.67 to 1574.2) | 525.22 (458.8 to 593.27) | 0.57 (0.49 to 0.67) |
| Germany | 339825.11 (299327.9 to 382748.85) | 398.05 (350.62 to 448.33) | 142.13 (124.57 to 159.72) | -0.02 (-0.08 to 0.04) | 1995249.41 (1724732.07 to 2268185.83) | 2337.13 (2020.26 to 2656.83) | 820.5 (713.82 to 930.77) | 0.71 (0.59 to 0.85) |
| Greece | 37087.06 (31837.75 to 42953.64) | 364.5 (312.9 to 422.15) | 119.17 (103.16 to 136.72) | -0.04 (-0.07 to -0.01) | 212406.78 (181047.78 to 246247.64) | 2087.55 (1779.36 to 2420.15) | 671.46 (575.61 to 767.68) | 1.06 (0.94 to 1.18) |
| Iceland | 798.82 (689.47 to 898.01) | 227.98 (196.77 to 256.29) | 122.36 (106.34 to 137.53) | -0.09 (-0.13 to -0.06) | 4529.84 (3891.07 to 5104.32) | 1292.81 (1110.51 to 1456.77) | 683.68 (586.64 to 767.04) | 0.4 (0.34 to 0.46) |
| Ireland | 9578.78 (8205.25 to 11079.58) | 193.85 (166.05 to 224.22) | 111.99 (95.75 to 128.99) | -0.08 (-0.12 to -0.05) | 53858.62 (45780.62 to 62139.75) | 1089.95 (926.48 to 1257.54) | 629.49 (535.55 to 725.24) | 0.42 (0.36 to 0.49) |
| Israel | 15408.04 (13246.95 to 17721.53) | 160.6 (138.08 to 184.72) | 113.13 (97.01 to 130.26) | -0.06 (-0.09 to -0.03) | 87011.55 (74414.95 to 100596.09) | 906.94 (775.65 to 1048.54) | 636.97 (546.32 to 734.42) | 0.42 (0.34 to 0.49) |
| Italy | 248809.37 (215069.24 to 285482.01) | 415.99 (359.58 to 477.3) | 134.76 (116.74 to 153.65) | 0.16 (0.12 to 0.21) | 1427945.83 (1213976.05 to 1647057.05) | 2387.41 (2029.67 to 2753.75) | 759.15 (652.54 to 869.83) | 1.14 (1 to 1.31) |
| Luxembourg | 1033.34 (879.65 to 1191.16) | 160.39 (136.54 to 184.89) | 87.36 (74.31 to 101.13) | -0.13 (-0.21 to -0.07) | 5610.09 (4761.18 to 6520.46) | 870.77 (739.01 to 1012.07) | 473.86 (402.43 to 551.8) | 0.09 (-0.01 to 0.18) |
| Malta | 1295.27 (1113.12 to 1493) | 292.9 (251.71 to 337.62) | 113.91 (98.03 to 130.83) | -0.07 (-0.11 to -0.04) | 7301.93 (6248.26 to 8443.39) | 1651.2 (1412.93 to 1909.32) | 642.06 (551.42 to 738.48) | 1.24 (1.13 to 1.36) |
| Monaco | 135.76 (116.44 to 156.87) | 358.56 (307.54 to 414.31) | 113.72 (97.81 to 131.33) | -0.08 (-0.11 to -0.04) | 769.03 (656.81 to 893.59) | 2031.07 (1734.67 to 2360.04) | 639.25 (542.47 to 742.18) | 0.05 (0 to 0.1) |
| Netherlands | 48272.06 (42167.91 to 54729.64) | 280.48 (245.01 to 318) | 121.79 (106.84 to 137.86) | -0.05 (-0.1 to 0.01) | 278818.7 (242063.8 to 316184.86) | 1620.03 (1406.48 to 1837.15) | 700.28 (610.56 to 794.56) | 0.63 (0.54 to 0.74) |
| Norway | 13148.55 (11351.74 to 15112.53) | 242.68 (209.52 to 278.93) | 114.3 (98.69 to 131.41) | -0.16 (-0.2 to -0.14) | 73853.45 (63746.2 to 85242.96) | 1363.1 (1176.55 to 1573.31) | 639.18 (549.63 to 735.45) | -0.03 (-0.07 to 0) |
| Portugal | 35666.19 (30670.18 to 41513.83) | 336.22 (289.13 to 391.35) | 116.97 (100.45 to 134.76) | -0.01 (-0.06 to 0.03) | 203138.15 (171368.87 to 235887.26) | 1914.98 (1615.49 to 2223.7) | 659.36 (561.71 to 757.5) | 1.22 (1.09 to 1.35) |
| San Marino | 105.89 (91.94 to 122.26) | 323.43 (280.82 to 373.42) | 110.9 (96.02 to 127.71) | -0.11 (-0.14 to -0.07) | 604.55 (518.4 to 698.57) | 1846.5 (1583.39 to 2133.69) | 623.02 (535.54 to 718.97) | 0.64 (0.57 to 0.73) |
| Spain | 123769.74 (107147.57 to 142152.12) | 271.73 (235.23 to 312.08) | 102.5 (88.99 to 116.45) | -0.12 (-0.2 to -0.05) | 713870.3 (618875.65 to 810219.95) | 1567.25 (1358.69 to 1778.77) | 582.15 (504.96 to 664.35) | 0.63 (0.49 to 0.79) |
| Sweden | 33510.67 (29061.12 to 38427.12) | 323.04 (280.15 to 370.43) | 126.32 (109.55 to 144.06) | -0.08 (-0.12 to -0.04) | 185342.61 (159942.23 to 212192.54) | 1786.69 (1541.83 to 2045.52) | 697.2 (600.37 to 799.05) | 0.18 (0.11 to 0.23) |
| Switzerland | 24775.98 (21497.92 to 28441.27) | 277.67 (240.93 to 318.75) | 113.27 (97.88 to 129.61) | -0.09 (-0.13 to -0.06) | 141610.16 (121473.76 to 164116.96) | 1587.06 (1361.38 to 1839.3) | 639.88 (549.35 to 735.13) | 0.31 (0.24 to 0.37) |
| UK | 164947.03 (142721.11 to 190062.16) | 243.11 (210.35 to 280.13) | 107.93 (93.37 to 123.89) | -0.06 (-0.07 to -0.04) | 906466.76 (778218.16 to 1036141.22) | 1336.02 (1147 to 1527.14) | 591.08 (508.13 to 674.77) | 0.26 (0.24 to 0.28) |
| **Latin America and Caribbean** | **657102.31 (579984.73 to 743300.86)** | **110.6 (97.62 to 125.11)** | **111.22 (97.62 to 126.41)** | **-0.02 (-0.03 to -0.01)** | **3808451.45 (3320823.09 to 4329826.61)** | **641.03 (558.95 to 728.78)** | **645.55 (563.65 to 734.66)** | **-0.01 (-0.02 to 0)** |
| **Andean Latin America** | 44485.77 (38612.47 to 50841.31) | 67.27 (58.39 to 76.88) | 79.55 (68.95 to 91.05) | -0.01 (-0.04 to 0.01) | 248164.72 (215286.87 to 283419.3) | 375.25 (325.53 to 428.56) | 444.09 (384.1 to 507.73) | -0.02 (-0.05 to 0.01) |
| Bolivia | 6052.02 (5222.14 to 6916.08) | 51.3 (44.27 to 58.63) | 82.05 (71.22 to 94.16) | -0.02 (-0.05 to 0.02) | 33654.98 (28943.35 to 38346.97) | 285.28 (245.34 to 325.05) | 456.33 (392.47 to 522.57) | 0.63 (0.57 to 0.68) |
| Ecuador | 12516.95 (10755.67 to 14473.23) | 69.29 (59.54 to 80.12) | 81.16 (69.99 to 93.4) | -0.02 (-0.07 to 0.01) | 70162.8 (59863.26 to 80085.39) | 388.38 (331.37 to 443.31) | 455.05 (388.62 to 521.67) | 0.83 (0.75 to 0.9) |
| Peru | 25916.8 (22444.97 to 29526.09) | 71.45 (61.88 to 81.4) | 78.28 (67.57 to 89.77) | -0.01 (-0.05 to 0.03) | 144346.95 (125304.08 to 165281.48) | 397.97 (345.47 to 455.69) | 436.46 (377.5 to 501.78) | 0.85 (0.77 to 0.93) |
| **Caribbean** | 52399.68 (45969.58 to 59446.22) | 110.41 (96.86 to 125.26) | 95.6 (83.53 to 108.64) | -0.02 (-0.04 to 0) | 301093.02 (261138.14 to 341198.16) | 634.43 (550.24 to 718.94) | 550.22 (476.89 to 624.84) | -0.01 (-0.04 to 0.02) |
| Antigua and Barbuda | 88.13 (76.42 to 100.88) | 98.58 (85.48 to 112.85) | 95.08 (82.7 to 109.64) | -0.02 (-0.06 to 0.01) | 504.43 (431.53 to 579.64) | 564.27 (482.72 to 648.39) | 545.71 (468.4 to 624.81) | 0.03 (-0.02 to 0.08) |
| The Bahamas | 325.92 (284.71 to 372.12) | 84.01 (73.38 to 95.92) | 95.28 (82.97 to 109.64) | -0.02 (-0.05 to 0.01) | 1860.25 (1605.9 to 2119.01) | 479.49 (413.93 to 546.18) | 545.68 (469.68 to 625.79) | 0.7 (0.64 to 0.76) |
| Barbados | 497.27 (433.27 to 572.72) | 166.3 (144.89 to 191.53) | 94.55 (82.58 to 109.16) | -0.04 (-0.08 to 0) | 2857.43 (2449.23 to 3266.08) | 955.58 (819.07 to 1092.24) | 542.29 (465 to 620.45) | 0.31 (0.25 to 0.38) |
| Belize | 243.77 (213.81 to 276.37) | 56.81 (49.83 to 64.41) | 97.17 (84.64 to 110.79) | -0.04 (-0.07 to 0) | 1391.7 (1199.27 to 1582.34) | 324.35 (279.5 to 368.78) | 557.96 (479.96 to 636.81) | 0.16 (0.11 to 0.2) |
| Bermuda | 150.04 (129.91 to 172.68) | 236.14 (204.45 to 271.77) | 98.24 (84.8 to 112.71) | -0.02 (-0.05 to 0.02) | 870.04 (748.69 to 998.78) | 1369.27 (1178.29 to 1571.87) | 567.27 (489.1 to 648.4) | 1.5 (1.39 to 1.63) |
| Cuba | 19277.53 (16865.19 to 21941.19) | 171.06 (149.65 to 194.69) | 91.41 (79.7 to 103.65) | -0.01 (-0.05 to 0.03) | 111074.56 (96366.19 to 125727.27) | 985.62 (855.1 to 1115.64) | 526.06 (456.06 to 596.36) | 1.09 (0.97 to 1.2) |
| Dominica | 73.75 (63.79 to 84.24) | 109.94 (95.1 to 125.59) | 96.57 (83.47 to 110.4) | -0.03 (-0.06 to 0.01) | 422.34 (363.59 to 481.13) | 629.63 (542.05 to 717.28) | 552.34 (475.16 to 630.23) | 0.37 (0.32 to 0.43) |
| Dominican Republic | 9479.28 (8274.84 to 10747.68) | 86.07 (75.14 to 97.59) | 99.53 (86.68 to 113.07) | 0 (-0.05 to 0.05) | 54453.25 (46945.37 to 61995.55) | 494.45 (426.28 to 562.94) | 572.64 (494.88 to 653) | 1.08 (0.97 to 1.2) |
| Grenada | 91.61 (79.48 to 105.21) | 89.27 (77.45 to 102.52) | 98.02 (85.92 to 112.22) | -0.02 (-0.05 to 0.02) | 520.88 (448.55 to 595.81) | 507.55 (437.07 to 580.56) | 562.63 (487.52 to 643.75) | -0.08 (-0.13 to -0.02) |
| Guyana | 481.5 (419.37 to 548.41) | 62.96 (54.84 to 71.71) | 96.25 (83.56 to 110.32) | -0.01 (-0.04 to 0.03) | 2730.83 (2327.3 to 3102.13) | 357.09 (304.33 to 405.64) | 549.03 (471.54 to 629.36) | 0.7 (0.64 to 0.77) |
| Haiti | 4672.18 (4066.33 to 5353.52) | 36.32 (31.61 to 41.62) | 94.82 (82.42 to 108.66) | -0.07 (-0.1 to -0.04) | 26287.68 (22588.34 to 30024.23) | 204.35 (175.59 to 233.4) | 541.86 (468.24 to 619.7) | 0.05 (0.01 to 0.08) |
| Jamaica | 3489.77 (3046.34 to 3974.29) | 124.64 (108.8 to 141.94) | 104.77 (91.01 to 120.07) | -0.05 (-0.08 to -0.02) | 20331.57 (17532.62 to 23073.05) | 726.16 (626.19 to 824.07) | 609.75 (523.06 to 695.65) | 0.42 (0.36 to 0.5) |
| Puerto Rico | 8775 (7669.89 to 10036.22) | 266.37 (232.82 to 304.65) | 97.8 (84.88 to 112.14) | -0.02 (-0.06 to 0.01) | 50546.79 (43476.95 to 57995.07) | 1534.35 (1319.74 to 1760.44) | 563.62 (484.51 to 646.62) | 1.74 (1.6 to 1.88) |
| Saint Kitts and Nevis | 48.45 (42.03 to 55.56) | 82.62 (71.67 to 94.74) | 93.38 (80.85 to 107.47) | -0.01 (-0.04 to 0.03) | 276.67 (236.86 to 315.07) | 471.77 (403.89 to 537.25) | 534.03 (461.67 to 613.08) | -0.01 (-0.07 to 0.05) |
| Saint Lucia | 222.62 (191.92 to 254.78) | 125.41 (108.12 to 143.53) | 95.98 (82.99 to 109.74) | -0.03 (-0.06 to 0.01) | 1281.16 (1097.52 to 1469.97) | 721.73 (618.28 to 828.09) | 551.55 (473.03 to 632.04) | 1.22 (1.12 to 1.34) |
| Saint Vincent and the Grenadines | 127.75 (110.98 to 146.47) | 111.98 (97.29 to 128.4) | 96.56 (84.19 to 110.27) | -0.05 (-0.08 to -0.02) | 734.54 (630.21 to 840.15) | 643.91 (552.45 to 736.49) | 553.95 (476.99 to 632.63) | 0.83 (0.77 to 0.9) |
| Suriname | 579.51 (506.28 to 662.91) | 100.05 (87.4 to 114.44) | 100.19 (87.41 to 115.47) | -0.05 (-0.08 to -0.02) | 3317.27 (2872.38 to 3779.51) | 572.69 (495.88 to 652.49) | 574.18 (495.68 to 655.29) | 0.66 (0.6 to 0.72) |
| Trinidad and Tobago | 1820.91 (1586.08 to 2069.55) | 130.71 (113.85 to 148.55) | 98.6 (85.73 to 112.51) | -0.02 (-0.06 to 0.01) | 10398.55 (8926.38 to 11847.16) | 746.41 (640.74 to 850.4) | 564.63 (486.16 to 644.68) | 1.15 (1.06 to 1.25) |
| Virgin Islands | 181.43 (155.51 to 212.04) | 211.2 (181.04 to 246.84) | 94.57 (82.02 to 109.17) | -0.03 (-0.06 to 0) | 1043.74 (892.09 to 1222.19) | 1215.03 (1038.5 to 1422.77) | 543.82 (470.45 to 627.55) | 2.57 (2.39 to 2.74) |
| **Central Latin America** | 248660.86 (218264.63 to 282093.9) | 98.28 (86.27 to 111.5) | 106.12 (92.53 to 120.99) | -0.05 (-0.06 to -0.03) | 1397100.1 (1216190.79 to 1585185.8) | 552.21 (480.7 to 626.55) | 596.48 (518.98 to 680.63) | -0.05 (-0.06 to -0.03) |
| Colombia | 63668.02 (55801.53 to 72057.75) | 129.77 (113.74 to 146.88) | 112.13 (97.75 to 127.51) | -0.01 (-0.05 to 0.02) | 362960.55 (313431.55 to 410683.84) | 739.82 (638.87 to 837.1) | 638.88 (549.98 to 725.16) | 1.64 (1.53 to 1.74) |
| Costa Rica | 6142.91 (5378.37 to 6984.96) | 129.38 (113.28 to 147.12) | 110.62 (95.96 to 126.87) | -0.03 (-0.06 to 0.01) | 35074.12 (30505.9 to 39916.05) | 738.73 (642.51 to 840.71) | 631.1 (547.39 to 722.93) | 1.18 (1.11 to 1.26) |
| El Salvador | 7619.08 (6699.58 to 8707.92) | 118.12 (103.87 to 135) | 112.22 (98.14 to 128.45) | 0.01 (-0.02 to 0.04) | 43345.73 (37706.06 to 49583.48) | 672 (584.57 to 768.71) | 637.92 (552.58 to 726.95) | 1.05 (0.98 to 1.13) |
| Guatemala | 10937.52 (9620.14 to 12427.78) | 69.37 (61.01 to 78.82) | 112.54 (98.73 to 127.7) | -0.01 (-0.04 to 0.02) | 61937.49 (53270.19 to 70939.13) | 392.82 (337.85 to 449.91) | 639.86 (553.28 to 730.62) | 1.13 (1.04 to 1.23) |
| Honduras | 5675.18 (4919.35 to 6494.74) | 56.13 (48.66 to 64.24) | 113.19 (98.75 to 129.15) | -0.02 (-0.05 to 0.01) | 31858.8 (27158.97 to 36513.41) | 315.12 (268.63 to 361.16) | 641.67 (553.16 to 730.68) | 0.43 (0.37 to 0.48) |
| Mexico | 110466.59 (96168.25 to 125493.7) | 85.45 (74.39 to 97.07) | 97.19 (84.27 to 111.26) | -0.08 (-0.1 to -0.07) | 608490.05 (526098.39 to 699599.88) | 470.69 (406.96 to 541.17) | 534.2 (460.41 to 612.87) | 1 (0.96 to 1.05) |
| Nicaragua | 4883.04 (4276.82 to 5562.46) | 73.22 (64.13 to 83.41) | 114.62 (100.58 to 131.05) | -0.01 (-0.04 to 0.02) | 27802.05 (24196.83 to 31745.19) | 416.89 (362.83 to 476.01) | 654.85 (569.17 to 748.6) | 0.98 (0.91 to 1.06) |
| Panama | 4943.26 (4335.55 to 5638.24) | 115.17 (101.01 to 131.37) | 108.64 (94.58 to 124.54) | -0.01 (-0.04 to 0.02) | 28209.16 (24265.17 to 32083.45) | 657.25 (565.36 to 747.52) | 620.46 (530.21 to 708.4) | 0.88 (0.81 to 0.96) |
| Venezuela | 34325.27 (30253.57 to 38771.11) | 128.9 (113.61 to 145.6) | 124.37 (108.4 to 141.62) | -0.02 (-0.06 to 0.01) | 197422.16 (170951.71 to 222398.3) | 741.38 (641.98 to 835.18) | 717.86 (620.45 to 816.18) | 1.39 (1.29 to 1.49) |
| **Tropical Latin America** | 311555.99 (274795.89 to 352659.1) | 136.93 (120.78 to 155) | 126.83 (111.77 to 144.42) | -0.02 (-0.04 to 0) | 1862093.6 (1617474.95 to 2116516.33) | 818.41 (710.9 to 930.24) | 759.83 (660 to 867.54) | 0 (-0.02 to 0.02) |
| Brazil | 305420.63 (269291.89 to 345695.61) | 138.6 (122.21 to 156.88) | 127.08 (112.01 to 144.66) | -0.02 (-0.04 to 0) | 1825794.91 (1586087.93 to 2075169.48) | 828.57 (719.78 to 941.73) | 761.45 (661.47 to 869.62) | 1.34 (1.28 to 1.4) |
| Paraguay | 6135.36 (5387.57 to 6970.09) | 85.58 (75.15 to 97.23) | 115.77 (101.31 to 132.33) | -0.06 (-0.09 to -0.03) | 36298.69 (31299.07 to 41134.53) | 506.34 (436.6 to 573.8) | 687.12 (593.84 to 779.77) | 0.43 (0.38 to 0.48) |
| **North Africa and Middle East** | **468045.33 (411549.98 to 530963.36)** | **75.13 (66.06 to 85.23)** | **132.19 (115.75 to 150.35)** | **-0.04 (-0.06 to -0.03)** | **2684371.49 (2322373.37 to 3040389.42)** | **430.88 (372.77 to 488.02)** | **772.66 (671.2 to 877.55)** | **-0.05 (-0.06 to -0.04)** |
| **North Africa and Middle East** |  |  |  |  |  |  |  |  |
| Afghanistan | 8764.02 (7688.23 to 10025.79) | 28.07 (24.62 to 32.11) | 130.94 (115.12 to 149.09) | -0.01 (-0.04 to 0.01) | 49010.34 (42192.18 to 56057.24) | 156.97 (135.14 to 179.54) | 761.83 (655.07 to 867.52) | -0.6 (-0.61 to -0.58) |
| Algeria | 37174.11 (32166.59 to 43066.26) | 84.11 (72.78 to 97.44) | 128.59 (112.65 to 146.91) | -0.04 (-0.07 to -0.01) | 213904.38 (183631.49 to 246716.53) | 483.97 (415.48 to 558.21) | 752.64 (650.93 to 866.12) | 0.78 (0.69 to 0.87) |
| Bahrain | 691.66 (594.1 to 787.86) | 45.22 (38.84 to 51.51) | 130.61 (114.78 to 148.7) | -0.02 (-0.06 to 0.01) | 3851.82 (3298.97 to 4401.02) | 251.82 (215.68 to 287.72) | 765.69 (660.19 to 875.62) | 0.71 (0.64 to 0.78) |
| Egypt | 50931.45 (44458.72 to 57308.66) | 48.22 (42.09 to 54.26) | 126.46 (111.45 to 144.07) | -0.03 (-0.07 to 0) | 283117.84 (244748.78 to 318071.15) | 268.03 (231.71 to 301.13) | 726.9 (630.54 to 823.49) | 0.17 (0.13 to 0.22) |
| Iran | 87936.73 (77508.07 to 99878.87) | 103.02 (90.81 to 117.01) | 133.73 (117.53 to 151.85) | -0.03 (-0.04 to -0.02) | 506627.06 (438927.28 to 578904.69) | 593.55 (514.23 to 678.22) | 775.51 (671.84 to 887.85) | 1.53 (1.42 to 1.65) |
| Iraq | 22203.92 (19382.49 to 25183.82) | 53.86 (47.02 to 61.09) | 129.62 (113.05 to 148.98) | -0.04 (-0.07 to -0.01) | 126348.59 (108197.5 to 144603.83) | 306.49 (262.46 to 350.77) | 759.67 (652.95 to 868.12) | 0.02 (-0.02 to 0.07) |
| Jordan | 7242.94 (6314.13 to 8274.12) | 58.77 (51.23 to 67.14) | 134.51 (116.99 to 153.81) | 0.01 (-0.02 to 0.04) | 41147.49 (35428.52 to 46861.53) | 333.87 (287.46 to 380.23) | 786.72 (675.7 to 906.66) | 0.78 (0.72 to 0.85) |
| Kuwait | 2813.54 (2484.36 to 3155.38) | 60.51 (53.43 to 67.86) | 131.46 (115.44 to 149.34) | -0.05 (-0.08 to -0.01) | 16140.61 (14064.72 to 18138.01) | 347.1 (302.46 to 390.06) | 771.61 (668.04 to 878.03) | 0.91 (0.84 to 0.99) |
| Lebanon | 9166.7 (8003.26 to 10453.15) | 165.45 (144.45 to 188.67) | 140.48 (122.53 to 159.62) | 0.01 (-0.03 to 0.04) | 54345.82 (46449.56 to 62272.48) | 980.9 (838.38 to 1123.97) | 828.25 (710.4 to 948.14) | 1.1 (0.99 to 1.19) |
| Libya | 5286.67 (4619.37 to 5998.1) | 76.95 (67.23 to 87.3) | 130.47 (114.04 to 148.13) | -0.05 (-0.08 to -0.02) | 30320.88 (26220.59 to 34401.49) | 441.32 (381.64 to 500.71) | 762.64 (660.37 to 872.63) | 0.48 (0.44 to 0.53) |
| Morocco | 36513.88 (31637.29 to 41831.35) | 98.22 (85.1 to 112.52) | 127.85 (111.31 to 146.15) | -0.07 (-0.09 to -0.04) | 210666.53 (180863.14 to 239496.04) | 566.66 (486.5 to 644.21) | 748.52 (644.54 to 856.83) | 0.53 (0.48 to 0.59) |
| Oman | 1618.88 (1401.4 to 1862.91) | 34.42 (29.79 to 39.6) | 124.36 (108.14 to 143.21) | -0.06 (-0.1 to -0.03) | 9013.8 (7681.12 to 10321.48) | 191.63 (163.3 to 219.43) | 728.25 (624.77 to 840.49) | 0.05 (0 to 0.09) |
| Palestine | 2402.2 (2102.66 to 2729.16) | 46.78 (40.94 to 53.14) | 131.55 (115.83 to 150.08) | -0.04 (-0.07 to 0) | 13745.51 (11877.37 to 15659.28) | 267.65 (231.28 to 304.92) | 773.83 (669.58 to 881.66) | -0.01 (-0.05 to 0.02) |
| Qatar | 640.05 (553.09 to 721.34) | 21.5 (18.58 to 24.23) | 126.56 (110.1 to 145.4) | -0.02 (-0.06 to 0.01) | 3426.4 (2935.31 to 3892.26) | 115.09 (98.6 to 130.74) | 740.91 (636.99 to 852.34) | 0.26 (0.2 to 0.31) |
| Saudi Arabia | 13064.43 (11314.69 to 14779.13) | 34.65 (30.01 to 39.2) | 120.44 (104.42 to 138.45) | -0.05 (-0.09 to -0.02) | 71831.51 (61575.88 to 82117.55) | 190.51 (163.31 to 217.79) | 701.74 (600.97 to 807.91) | -0.02 (-0.07 to 0.04) |
| Sudan | 18537.9 (16236.04 to 21018.45) | 42.7 (37.39 to 48.41) | 125.81 (110.08 to 143.27) | -0.07 (-0.09 to -0.04) | 105439.7 (91145.89 to 119876.83) | 242.84 (209.92 to 276.09) | 732.33 (633.47 to 834.54) | -0.1 (-0.13 to -0.06) |
| Syria | 13050.94 (11335.25 to 14935.98) | 93.02 (80.79 to 106.45) | 129.77 (113.5 to 147.95) | -0.07 (-0.1 to -0.04) | 74180.56 (63562.86 to 84734.42) | 528.71 (453.04 to 603.93) | 753.82 (648.01 to 860.72) | 1.06 (0.98 to 1.15) |
| Tunisia | 15844.56 (13951.26 to 18010.81) | 133.79 (117.81 to 152.09) | 134.32 (117.99 to 153.04) | -0.06 (-0.09 to -0.03) | 92441.29 (80299.06 to 104677.64) | 780.58 (678.05 to 883.91) | 791.09 (685.56 to 901.07) | 1.07 (0.98 to 1.15) |
| Türkiye | 117990.91 (102837.51 to 133396.24) | 141.12 (122.99 to 159.54) | 139.1 (120.57 to 158.16) | -0.06 (-0.08 to -0.03) | 688425.25 (595237.19 to 787215.85) | 823.36 (711.9 to 941.51) | 819.36 (706.2 to 936.59) | 1.01 (0.93 to 1.09) |
| United Arab Emirates | 2323.61 (1962.77 to 2690.68) | 24.13 (20.38 to 27.94) | 113.49 (98.05 to 131.08) | -0.08 (-0.11 to -0.05) | 11960.24 (9939.79 to 14033.13) | 124.18 (103.2 to 145.71) | 652.43 (552.16 to 753.8) | 0.37 (0.24 to 0.51) |
| Yemen | 13409.67 (11724.42 to 15191.27) | 39.86 (34.85 to 45.15) | 133.11 (117.14 to 151.66) | -0.08 (-0.1 to -0.05) | 75922.15 (66029.52 to 86697.17) | 225.67 (196.26 to 257.69) | 777.94 (673.66 to 883.49) | 0.15 (0.1 to 0.19) |
| **South Asia** | **924833.04 (799983.38 to 1056260.56)** | **50.08 (43.32 to 57.2)** | **79 (68.26 to 90.52)** | **-0.02 (-0.03 to -0.01)** | **5147477.66 (4444260.18 to 5886074.83)** | **278.76 (240.68 to 318.76)** | **437.07 (377 to 500.95)** | **-0.02 (-0.03 to -0.01)** |
| **South Asia** |  |  |  |  |  |  |  |  |
| Bangladesh | 92253.51 (79986.87 to 105806.58) | 56.03 (48.58 to 64.27) | 79.47 (68.72 to 90.87) | -0.04 (-0.06 to -0.01) | 516766.09 (446674.99 to 592095.31) | 313.88 (271.31 to 359.64) | 444.05 (383.22 to 506.23) | 1.01 (0.95 to 1.07) |
| Bhutan | 415.12 (359.89 to 474.92) | 54.84 (47.55 to 62.75) | 77.45 (67.36 to 88.68) | -0.08 (-0.11 to -0.05) | 2324.57 (1996.25 to 2666.14) | 307.12 (263.74 to 352.24) | 433.7 (372.38 to 497.86) | 1.65 (1.52 to 1.8) |
| India | 749489.73 (648646.24 to 856822.53) | 52.99 (45.86 to 60.57) | 78.92 (68.29 to 90.58) | -0.01 (-0.02 to 0) | 4169684.39 (3591611.95 to 4772663.15) | 294.78 (253.91 to 337.41) | 436.13 (376.02 to 501.15) | 0.86 (0.81 to 0.91) |
| Nepal | 14856.36 (12919.28 to 16959.64) | 47.72 (41.5 to 54.48) | 81.31 (70.51 to 93.7) | -0.11 (-0.14 to -0.08) | 83342.33 (71555.44 to 95053) | 267.73 (229.86 to 305.34) | 454.19 (392.41 to 519.26) | 0.63 (0.57 to 0.7) |
| Pakistan | 67818.32 (58773.45 to 77287.22) | 28.79 (24.95 to 32.81) | 78.8 (67.99 to 90.38) | -0.07 (-0.09 to -0.05) | 375360.28 (321683.67 to 430003.15) | 159.35 (136.56 to 182.55) | 433.58 (374.32 to 499.28) | -0.14 (-0.16 to -0.11) |
| **Southeast Asia, east Asia, and Oceania** | **3572388.21 (3088514.15 to 4097596.81)** | **163.5 (141.35 to 187.53)** | **141.59 (122.72 to 161.85)** | **0.19 (0.16 to 0.22)** | **20832670.92 (17820564.19 to 24001380.84)** | **953.44 (815.58 to 1098.46)** | **838.47 (720.09 to 967.55)** | **0.22 (0.19 to 0.24)** |
| **East Asia** | 2988724.23 (2569166.05 to 3434391.97) | 202.93 (174.44 to 233.19) | 149.61 (129.58 to 171.14) | 0.24 (0.21 to 0.27) | 17414173.15 (14854023.47 to 20142130.51) | 1182.41 (1008.57 to 1367.63) | 887.95 (759.95 to 1027.48) | 0.27 (0.24 to 0.30) |
| China | 2914112.02 (2504728.47 to 3350743.09) | 204.82 (176.05 to 235.51) | 151.47 (131.22 to 173.34) | 0.25 (0.21 to 0.28) | 16990827.32 (14488494.04 to 19672741.19) | 1194.23 (1018.35 to 1382.73) | 900.82 (770.92 to 1043.22) | 2.49 (2.35 to 2.63) |
| North Korea | 31408.03 (26865.11 to 36668.02) | 119 (101.79 to 138.93) | 108.5 (93.89 to 125.37) | -0.02 (-0.06 to 0.02) | 177068.33 (151285.67 to 204070.5) | 670.91 (573.22 to 773.22) | 618.92 (529.05 to 710.41) | 0.98 (0.88 to 1.09) |
| Taiwan (province of China) | 43204.18 (36979.75 to 48564.66) | 182.78 (156.45 to 205.46) | 98.1 (83.69 to 110.2) | 0.08 (0 to 0.18) | 246277.5 (209400.7 to 276216.28) | 1041.93 (885.91 to 1168.59) | 555.31 (472.14 to 624.76) | 2.71 (2.39 to 3.07) |
| **Oceania** | 5421.89 (4714.66 to 6169.14) | 38.93 (33.85 to 44.29) | 112.05 (96.98 to 128.81) | -0.04 (-0.06 to -0.02) | 30699.05 (26252.51 to 34933.76) | 220.42 (188.49 to 250.82) | 644.83 (554.28 to 737.37) | -0.05 (-0.07 to -0.03) |
| American Samoa | 40.75 (34.57 to 46.98) | 81.89 (69.48 to 94.41) | 109.14 (93.39 to 125.47) | -0.02 (-0.05 to 0.01) | 232.47 (196.34 to 265.3) | 467.2 (394.59 to 533.18) | 626.63 (528.15 to 722.51) | 1.46 (1.35 to 1.56) |
| Cook Islands | 27.99 (23.76 to 32.41) | 157.71 (133.9 to 182.62) | 109.53 (93.6 to 126.15) | -0.02 (-0.05 to 0.01) | 161.55 (136.37 to 186.36) | 910.28 (768.39 to 1050.07) | 631.64 (535.44 to 728.65) | 1.81 (1.69 to 1.94) |
| Federated States of Micronesia | 56.31 (48.36 to 64.41) | 54.9 (47.14 to 62.79) | 120.71 (104.84 to 139.46) | 0.01 (-0.02 to 0.05) | 321.4 (274.46 to 367.3) | 313.32 (267.56 to 358.07) | 695.38 (594.38 to 799.43) | 0.33 (0.26 to 0.39) |
| Fiji | 581.93 (494.81 to 672.43) | 62.95 (53.52 to 72.74) | 110.65 (95.5 to 127.91) | -0.02 (-0.05 to 0.02) | 3311 (2801.47 to 3815.98) | 358.15 (303.03 to 412.77) | 637.89 (544.12 to 735.6) | 0.89 (0.83 to 0.96) |
| Guam | 241.93 (210.23 to 274.75) | 151.97 (132.06 to 172.59) | 108.97 (93.85 to 125.54) | -0.01 (-0.04 to 0.03) | 1411.35 (1213.51 to 1616.17) | 886.54 (762.27 to 1015.21) | 629.81 (535.65 to 725.95) | 2.97 (2.69 to 3.27) |
| Kiribati | 53.96 (46.28 to 62.06) | 44.53 (38.2 to 51.22) | 121.84 (106.12 to 138.96) | 0.01 (-0.03 to 0.04) | 305.17 (259.91 to 349.6) | 251.87 (214.52 to 288.54) | 701.89 (602.78 to 803.92) | 0.18 (0.13 to 0.23) |
| Marshall Islands | 20.51 (17.28 to 23.84) | 36.45 (30.71 to 42.36) | 103.94 (89.43 to 120.5) | -0.03 (-0.06 to 0) | 115.54 (96.46 to 134.44) | 205.33 (171.41 to 238.91) | 594.07 (502.31 to 685.62) | 0.42 (0.35 to 0.49) |
| Nauru | 4.14 (3.53 to 4.76) | 37.58 (31.98 to 43.15) | 113.97 (98.71 to 131.23) | 0.03 (0 to 0.06) | 23.24 (19.6 to 26.87) | 210.79 (177.76 to 243.7) | 652.63 (555.94 to 749.51) | 0.32 (0.27 to 0.37) |
| Niue | 2.17 (1.84 to 2.51) | 129.86 (109.82 to 150.12) | 107.28 (91.33 to 123.83) | -0.03 (-0.06 to 0.01) | 12.48 (10.5 to 14.41) | 746.68 (628.29 to 862.1) | 616.47 (519.99 to 710.42) | 0.09 (0.04 to 0.14) |
| Northern Mariana Islands | 37.96 (32.26 to 43.73) | 78.28 (66.52 to 90.19) | 107.94 (92.46 to 125.17) | -0.01 (-0.04 to 0.02) | 217.41 (184.17 to 251.62) | 448.34 (379.79 to 518.89) | 621.13 (528.08 to 721.28) | 2.65 (2.5 to 2.81) |
| Palau | 15.91 (13.45 to 18.41) | 87.94 (74.33 to 101.75) | 103.98 (88.42 to 120.53) | -0.03 (-0.06 to 0) | 90.74 (75.66 to 104.74) | 501.4 (418.06 to 578.78) | 594.28 (501.85 to 687.51) | 0.76 (0.68 to 0.83) |
| Papua New Guinea | 3500.4 (3025.68 to 3981.16) | 33.46 (28.92 to 38.06) | 112.89 (97.86 to 129.7) | -0.06 (-0.09 to -0.03) | 19750.31 (16865.06 to 22461.78) | 188.79 (161.21 to 214.71) | 649.65 (557.31 to 742.38) | 0.11 (0.07 to 0.16) |
| Samoa | 124.74 (107.15 to 143.9) | 58.39 (50.16 to 67.35) | 108.37 (93.13 to 125.19) | -0.03 (-0.06 to 0.01) | 712.62 (599.61 to 819.5) | 333.56 (280.66 to 383.59) | 622.74 (531.09 to 716.31) | 0.39 (0.35 to 0.44) |
| Solomon Islands | 256.16 (219.18 to 295.4) | 37.47 (32.06 to 43.21) | 113.74 (98.07 to 131.08) | 0 (-0.03 to 0.03) | 1440.01 (1222.59 to 1652.24) | 210.66 (178.85 to 241.71) | 652.57 (555.17 to 753.61) | 0.4 (0.34 to 0.46) |
| Tokelau | 1.63 (1.4 to 1.89) | 118.93 (102.21 to 137.71) | 109.37 (94.11 to 126.6) | -0.02 (-0.05 to 0.01) | 9.34 (7.92 to 10.83) | 681.01 (577.77 to 789.75) | 626.8 (531.25 to 725.34) | 0.44 (0.38 to 0.5) |
| Tonga | 83.79 (72.87 to 96.65) | 78.83 (68.55 to 90.92) | 111.8 (97.12 to 128.75) | -0.03 (-0.06 to 0.01) | 481.57 (412.55 to 551.83) | 453.03 (388.11 to 519.13) | 644.39 (551.18 to 740.15) | 0.59 (0.52 to 0.67) |
| Tuvalu | 9.16 (7.94 to 10.59) | 74.05 (64.17 to 85.62) | 113.41 (97.97 to 130.03) | -0.02 (-0.06 to 0.01) | 52.18 (44.39 to 60.26) | 421.96 (358.97 to 487.26) | 650.7 (560.53 to 748.55) | 0.41 (0.35 to 0.48) |
| Vanuatu | 119.03 (101.08 to 138) | 38.03 (32.3 to 44.09) | 105.3 (90.64 to 121.61) | -0.02 (-0.05 to 0.02) | 672.38 (566.81 to 778.77) | 214.83 (181.1 to 248.82) | 604.27 (513.73 to 697.46) | 0.43 (0.38 to 0.49) |
| **Southeast Asia** | 578242.1 (505926.68 to 658512.73) | 82.81 (72.45 to 94.3) | 110.07 (96.11 to 125.72) | -0.04 (-0.05 to -0.03) | 3387798.72 (2922771.03 to 3857740.53) | 485.15 (418.55 to 552.44) | 644.38 (560.58 to 737.69) | -0.05 (-0.06 to -0.03) |
| Cambodia | 10161.61 (8837.78 to 11662.4) | 59.62 (51.85 to 68.42) | 112.21 (97.73 to 128.37) | -0.03 (-0.06 to 0) | 59413.39 (50607.01 to 68051.97) | 348.59 (296.92 to 399.27) | 658.61 (568.01 to 754.43) | 0.71 (0.65 to 0.78) |
| Indonesia | 189722.06 (164141.9 to 216604.17) | 68.02 (58.85 to 77.66) | 113.31 (98.38 to 129.52) | -0.02 (-0.04 to -0.01) | 1109363.84 (953356.39 to 1273165.62) | 397.74 (341.81 to 456.47) | 662.13 (571.11 to 761.15) | 0.6 (0.57 to 0.62) |
| Laos | 3764.48 (3279.76 to 4289.67) | 51.03 (44.46 to 58.14) | 111.82 (97.43 to 127.89) | -0.02 (-0.05 to 0.01) | 21887.64 (18988.04 to 24980.79) | 296.68 (257.38 to 338.61) | 655.85 (567.01 to 749.46) | 0.35 (0.29 to 0.42) |
| Malaysia | 26046.43 (22442.69 to 29858.18) | 81.88 (70.55 to 93.86) | 111.29 (95.99 to 127.46) | -0.04 (-0.07 to -0.01) | 153806.87 (130888.91 to 175274.95) | 483.48 (411.44 to 550.97) | 657.55 (561.66 to 750.29) | 0.59 (0.52 to 0.65) |
| Maldives | 309.2 (268.73 to 355.38) | 59.78 (51.96 to 68.71) | 113.22 (98.24 to 129.67) | 0.03 (0 to 0.06) | 1794.45 (1544.62 to 2056.18) | 346.95 (298.65 to 397.55) | 667.3 (572.03 to 764.23) | 1.1 (0.99 to 1.23) |
| Mauritius | 1882.68 (1628.51 to 2139.19) | 148.01 (128.03 to 168.18) | 111.73 (96.55 to 127.55) | -0.01 (-0.04 to 0.03) | 11135.55 (9549.14 to 12616.13) | 875.46 (750.74 to 991.86) | 657.17 (567.03 to 748.3) | 1.65 (1.54 to 1.76) |
| Myanmar | 44027.74 (38391.67 to 49952.4) | 78.04 (68.05 to 88.54) | 113.09 (99.06 to 128.82) | -0.07 (-0.1 to -0.04) | 257641.18 (222039.26 to 292332.33) | 456.65 (393.55 to 518.14) | 663.53 (571.48 to 757.76) | 0.59 (0.53 to 0.66) |
| Philippines | 72091.91 (63051.89 to 81980.06) | 63.66 (55.68 to 72.39) | 113.91 (99.74 to 130) | -0.04 (-0.05 to -0.04) | 419362.68 (364503.46 to 477877.45) | 370.3 (321.86 to 421.97) | 662.94 (575.83 to 762.08) | 0.57 (0.54 to 0.6) |
| Seychelles | 108.14 (93.69 to 124.29) | 102.57 (88.86 to 117.89) | 109.25 (94.47 to 126.6) | -0.03 (-0.07 to 0) | 635.89 (543.45 to 732.34) | 603.13 (515.45 to 694.61) | 643.49 (544.72 to 741.31) | 0.18 (0.13 to 0.24) |
| Sri Lanka | 25785.85 (22298.96 to 29882.32) | 115.79 (100.13 to 134.18) | 107.46 (93.3 to 123.54) | -0.03 (-0.06 to 0) | 152888.79 (129858.71 to 175783.57) | 686.52 (583.11 to 789.33) | 634.13 (545.74 to 727.67) | 1.19 (1.11 to 1.27) |
| Thailand | 112595.36 (98737.66 to 127875.33) | 168.85 (148.07 to 191.77) | 103.27 (90.64 to 117.58) | 0.01 (-0.03 to 0.04) | 659436.75 (571370.82 to 751935.39) | 988.91 (856.84 to 1127.62) | 603.22 (522.58 to 689.6) | 2.45 (2.27 to 2.63) |
| Timor-Leste | 768.39 (665.6 to 888.26) | 54.97 (47.62 to 63.55) | 113.2 (98.46 to 129.74) | -0.06 (-0.09 to -0.03) | 4508.32 (3823.91 to 5176.88) | 322.54 (273.58 to 370.38) | 664.45 (572.75 to 759.71) | 1.04 (0.94 to 1.15) |
| Viet Nam | 90171.72 (78824.26 to 102840.1) | 89.93 (78.61 to 102.57) | 110.09 (96.21 to 126.57) | -0.06 (-0.09 to -0.03) | 531198.12 (453585.9 to 601711.47) | 529.78 (452.37 to 600.1) | 649.42 (556.89 to 744.39) | 0.53 (0.48 to 0.58) |
| **Sub-Saharan Africa** | **314715.46 (275602.59 to 355387.48)** | **27.77 (24.32 to 31.36)** | **93.14 (81.33 to 105.66)** | **-0.04 (-0.05 to -0.03)** | **1788637.6 (1545495.05 to 2021240.25)** | **157.85 (136.39 to 178.37)** | **529.48 (461.19 to 601.18)** | **-0.04 (-0.05 to -0.03)** |
| **Central sub-Saharan Africa** | 44061.65 (38634.35 to 49576.49) | 32.18 (28.22 to 36.21) | 126.14 (111.31 to 143.21) | -0.01 (-0.03 to 0.02) | 253634.6 (220061.21 to 287410) | 185.23 (160.71 to 209.9) | 750.54 (654.7 to 848.11) | 0 (-0.03 to 0.02) |
| Angola | 9171.09 (7978.69 to 10423.48) | 28.04 (24.39 to 31.87) | 124.21 (109.07 to 141.23) | -0.03 (-0.06 to 0) | 52578.06 (45267.36 to 59748.76) | 160.76 (138.4 to 182.68) | 738.83 (636.99 to 840.23) | -0.02 (-0.05 to 0.01) |
| Central African Republic | 1621.77 (1391.37 to 1837.32) | 29.57 (25.37 to 33.5) | 130.87 (114.21 to 148.33) | -0.01 (-0.06 to 0.03) | 9274.37 (7989.9 to 10580.14) | 169.11 (145.69 to 192.92) | 795.18 (681.53 to 900.67) | -0.07 (-0.11 to -0.01) |
| Congo (Brazzaville) | 2079.11 (1885.98 to 2268.53) | 38.56 (34.98 to 42.08) | 120.8 (109.94 to 132.53) | -0.03 (-0.1 to 0.04) | 11812.92 (10542.1 to 13004.67) | 219.1 (195.53 to 241.2) | 706.08 (641.29 to 770.22) | 0.07 (-0.02 to 0.18) |
| Democratic Republic of the Congo | 29847.15 (26224.86 to 33721.91) | 33.16 (29.13 to 37.46) | 126.99 (111.77 to 144.57) | 0 (-0.03 to 0.04) | 172192.18 (149599.45 to 195620.21) | 191.29 (166.19 to 217.31) | 755.89 (656.94 to 858.4) | 0.05 (0.01 to 0.1) |
| Equatorial Guinea | 431.31 (377.19 to 490.2) | 28.52 (24.94 to 32.41) | 124.45 (108.79 to 141.57) | -0.04 (-0.07 to -0.01) | 2470.88 (2107.82 to 2799.92) | 163.38 (139.38 to 185.14) | 736.91 (636.47 to 836.63) | -0.26 (-0.29 to -0.23) |
| Gabon | 911.23 (793.75 to 1041.72) | 50.18 (43.71 to 57.36) | 123.01 (107.72 to 140.92) | -0.02 (-0.05 to 0.01) | 5306.2 (4563.16 to 6046) | 292.18 (251.26 to 332.91) | 734.43 (633.02 to 837.16) | -0.14 (-0.17 to -0.11) |
| **Eastern sub-Saharan Africa** | 121209.89 (106416 to 137289.38) | 28.45 (24.97 to 32.22) | 102.41 (89.7 to 116.09) | -0.04 (-0.06 to -0.03) | 692233.75 (597287.62 to 780537.63) | 162.46 (140.18 to 183.18) | 588.72 (513.88 to 667.2) | -0.05 (-0.06 to -0.04) |
| Burundi | 3237.26 (2822.78 to 3671.71) | 24.49 (21.35 to 27.77) | 100.5 (88.07 to 114.87) | -0.08 (-0.11 to -0.05) | 18569.38 (16038.99 to 21061.29) | 140.46 (121.32 to 159.31) | 580.93 (501.14 to 662.01) | -0.27 (-0.3 to -0.23) |
| Comoros | 380.71 (330.24 to 432.4) | 51.15 (44.37 to 58.09) | 100.96 (88.05 to 115.39) | -0.04 (-0.08 to -0.01) | 2185.94 (1875.35 to 2479.12) | 293.66 (251.94 to 333.05) | 582.1 (503.27 to 661.45) | 0.71 (0.65 to 0.78) |
| Djibouti | 402.28 (346.99 to 454.31) | 31.96 (27.57 to 36.09) | 104.02 (90.57 to 118.65) | -0.05 (-0.08 to -0.02) | 2298.61 (1984.27 to 2618.51) | 182.62 (157.65 to 208.03) | 603.12 (517.99 to 686.84) | 0.56 (0.5 to 0.61) |
| Eritrea | 1734.66 (1502.58 to 1974.89) | 26.29 (22.77 to 29.93) | 104.21 (90.44 to 119.18) | -0.06 (-0.09 to -0.03) | 9856.43 (8422.75 to 11260.03) | 149.39 (127.66 to 170.66) | 602.42 (518.16 to 687.76) | 0.45 (0.39 to 0.52) |
| Ethiopia | 34226.43 (30050.02 to 38961.22) | 31.42 (27.58 to 35.76) | 102.87 (90.07 to 116.73) | -0.07 (-0.09 to -0.06) | 194300.52 (168319.34 to 220688.34) | 178.36 (154.51 to 202.58) | 586.55 (509.54 to 668.44) | 0.2 (0.15 to 0.27) |
| Kenya | 16494.27 (14434.97 to 18731.66) | 32.95 (28.83 to 37.42) | 105.14 (91.55 to 119.62) | -0.02 (-0.02 to -0.01) | 94643.2 (81567.46 to 107743.54) | 189.05 (162.93 to 215.22) | 605.07 (525.16 to 689.45) | 0.17 (0.15 to 0.19) |
| Madagascar | 6742.84 (5808.33 to 7653.95) | 23.61 (20.34 to 26.8) | 99.76 (86.8 to 114.13) | -0.05 (-0.08 to -0.02) | 38470.68 (33085.35 to 44112.21) | 134.71 (115.86 to 154.47) | 574.95 (493.29 to 652.02) | -0.26 (-0.29 to -0.23) |
| Malawi | 5279.58 (4598.97 to 6026.93) | 27.15 (23.65 to 30.99) | 104.71 (90.82 to 119.89) | -0.01 (-0.04 to 0.02) | 30185.46 (25791.4 to 34281.05) | 155.21 (132.62 to 176.27) | 605.24 (517.75 to 689.89) | -0.01 (-0.05 to 0.03) |
| Mozambique | 7516.13 (6505.37 to 8549.26) | 24.19 (20.94 to 27.51) | 104.33 (90.49 to 119.04) | -0.03 (-0.06 to 0) | 43031.88 (36957.26 to 48763.6) | 138.49 (118.94 to 156.93) | 605.09 (520.43 to 691.27) | -0.26 (-0.28 to -0.23) |
| Rwanda | 4608.58 (4024.14 to 5193.13) | 34.73 (30.33 to 39.13) | 106.57 (93.24 to 120.76) | 0 (-0.03 to 0.03) | 26431.8 (22775.52 to 29897.62) | 199.18 (171.63 to 225.3) | 616.11 (532.05 to 699.77) | 0.29 (0.24 to 0.34) |
| Somalia | 3589.61 (3085.6 to 4105.02) | 16.61 (14.28 to 19) | 106.72 (93.34 to 121.51) | -0.01 (-0.04 to 0.02) | 20264.15 (17342.12 to 23142.5) | 93.79 (80.26 to 107.11) | 617.03 (535.75 to 699.67) | -0.11 (-0.14 to -0.07) |
| South Sudan | 2565.21 (2229.48 to 2898.94) | 26.52 (23.05 to 29.97) | 99.16 (85.85 to 113.38) | -0.06 (-0.09 to -0.04) | 14635.9 (12576.52 to 16624.69) | 151.31 (130.02 to 171.88) | 572.38 (489.94 to 650.54) | -0.23 (-0.26 to -0.19) |
| Tanzania | 18873.2 (16814.86 to 21095.49) | 32.29 (28.77 to 36.09) | 98.48 (87.78 to 110.14) | -0.08 (-0.12 to -0.04) | 108488.83 (95564.44 to 120854.15) | 185.62 (163.5 to 206.77) | 569.9 (503.41 to 636.97) | 0.03 (-0.02 to 0.08) |
| Uganda | 10730.74 (9352.38 to 12174.14) | 24.77 (21.59 to 28.11) | 102.68 (89.05 to 117.37) | -0.01 (-0.05 to 0.02) | 61427.57 (52963.18 to 69591.65) | 141.82 (122.27 to 160.66) | 594.04 (508.15 to 676.31) | -0.11 (-0.14 to -0.08) |
| Zambia | 4722.88 (4112.35 to 5326.1) | 24.2 (21.07 to 27.29) | 102.65 (89.99 to 117.22) | 0 (-0.02 to 0.03) | 26840.75 (23113.93 to 30576.62) | 137.54 (118.44 to 156.68) | 591.53 (514.14 to 674.45) | -0.04 (-0.07 to -0.01) |
| **Southern sub-Saharan Africa** | 47444.3 (41315.69 to 54029.13) | 59.08 (51.45 to 67.28) | 107.13 (93.16 to 122.19) | -0.05 (-0.06 to -0.04) | 268798.81 (231156.8 to 306085.98) | 334.73 (287.85 to 381.16) | 606.69 (524.69 to 692.07) | -0.05 (-0.07 to -0.04) |
| Botswana | 1062.42 (923.5 to 1217.56) | 44.39 (38.59 to 50.87) | 103.94 (90.71 to 119.61) | -0.04 (-0.08 to 0) | 6048.31 (5160.88 to 6915.55) | 252.72 (215.64 to 288.96) | 597.43 (511.15 to 685.77) | 0.49 (0.43 to 0.55) |
| Eswatini | 358.85 (309.79 to 410.98) | 31.06 (26.82 to 35.58) | 101.07 (88.65 to 115.8) | -0.04 (-0.07 to 0) | 2036.24 (1745.1 to 2331.62) | 176.26 (151.06 to 201.83) | 579.24 (499.45 to 661.83) | 0.23 (0.19 to 0.28) |
| Lesotho | 790.84 (681.8 to 906.47) | 42.19 (36.37 to 48.36) | 108.92 (94.83 to 124.74) | -0.01 (-0.05 to 0.02) | 4510.15 (3864.02 to 5113.19) | 240.62 (206.15 to 272.79) | 625.49 (537.97 to 713.46) | -0.13 (-0.16 to -0.09) |
| Namibia | 1012.4 (884.11 to 1148.16) | 41.64 (36.37 to 47.23) | 103.46 (89.84 to 117.7) | -0.03 (-0.06 to 0) | 5765.29 (4997.84 to 6520.55) | 237.14 (205.57 to 268.21) | 593.68 (514.23 to 676.82) | 0.28 (0.23 to 0.33) |
| South Africa | 39714.69 (34529.48 to 45264) | 69.85 (60.73 to 79.61) | 107.78 (93.63 to 122.59) | -0.06 (-0.07 to -0.04) | 224952.94 (193264.37 to 257574.63) | 395.67 (339.93 to 453.04) | 609.51 (526.77 to 695.77) | 0.33 (0.31 to 0.36) |
| Zimbabwe | 4505.11 (3920.98 to 5133.42) | 28.89 (25.14 to 32.92) | 102.44 (89.41 to 116.93) | -0.04 (-0.07 to -0.01) | 25485.88 (21694.58 to 29014.51) | 163.42 (139.11 to 186.05) | 584.43 (506.45 to 665.47) | -0.01 (-0.05 to 0.03) |
| **Western sub-Saharan Africa** | 101999.61 (88928.41 to 115137.19) | 20.82 (18.16 to 23.51) | 73.18 (63.36 to 83.46) | -0.07 (-0.08 to -0.06) | 573970.43 (493782.59 to 650724.56) | 117.18 (100.81 to 132.85) | 406.02 (352.89 to 462.39) | -0.07 (-0.08 to -0.06) |
| Benin | 2908.59 (2551.69 to 3315.77) | 21.55 (18.9 to 24.56) | 75.85 (65.91 to 87.05) | -0.1 (-0.19 to -0.05) | 16564.25 (14499.64 to 18965.21) | 122.71 (107.41 to 140.49) | 428.5 (376.12 to 490.81) | -0.24 (-0.32 to -0.19) |
| Burkina Faso | 5394.01 (4694.53 to 6139.72) | 23.7 (20.63 to 26.97) | 79.8 (69.33 to 91.77) | -0.06 (-0.09 to -0.04) | 30516.97 (26149.42 to 34754.87) | 134.07 (114.89 to 152.69) | 447.82 (385.98 to 510.39) | -0.13 (-0.16 to -0.1) |
| Cabo Verde | 319.35 (275.95 to 362.53) | 57.1 (49.34 to 64.82) | 78.13 (67.85 to 89.4) | -0.05 (-0.08 to -0.01) | 1800.19 (1541.44 to 2038.63) | 321.89 (275.62 to 364.52) | 440.96 (378.26 to 500.17) | 0.02 (-0.03 to 0.06) |
| Cameroon | 6432.67 (5588.14 to 7315.99) | 20.24 (17.58 to 23.02) | 75.45 (65.39 to 86.37) | -0.05 (-0.08 to -0.02) | 36246.17 (31043.86 to 41426.57) | 114.05 (97.68 to 130.36) | 421.43 (362.09 to 481.18) | -0.14 (-0.17 to -0.11) |
| Chad | 3051.9 (2649.09 to 3472.22) | 17.19 (14.92 to 19.56) | 76.45 (66.54 to 87.28) | -0.09 (-0.12 to -0.06) | 17240.7 (14830.9 to 19501.84) | 97.13 (83.56 to 109.87) | 428.14 (366.66 to 486.61) | -0.45 (-0.47 to -0.42) |
| Côte d'Ivoire | 5597.97 (4849.67 to 6400.62) | 20.09 (17.41 to 22.97) | 76.63 (66.06 to 88.28) | -0.04 (-0.07 to 0) | 31517.83 (27191.66 to 36062.62) | 113.12 (97.59 to 129.43) | 428.76 (367.98 to 489.19) | 0.3 (0.25 to 0.35) |
| The Gambia | 572.85 (492.74 to 657.96) | 23.93 (20.58 to 27.48) | 77.92 (67.57 to 89.88) | -0.07 (-0.11 to -0.04) | 3221.86 (2769.92 to 3681.37) | 134.57 (115.7 to 153.77) | 436.83 (374.25 to 499.13) | 0.18 (0.13 to 0.22) |
| Ghana | 8607.84 (7445.88 to 9814.47) | 25.14 (21.74 to 28.66) | 75.09 (64.72 to 86.42) | -0.02 (-0.06 to 0.01) | 48622.61 (41396.42 to 55386.13) | 141.98 (120.88 to 161.73) | 419.76 (360.59 to 476.55) | 0.18 (0.14 to 0.23) |
| Guinea | 3371.56 (2919.96 to 3850.38) | 25.11 (21.74 to 28.67) | 78.39 (67.86 to 90.01) | -0.06 (-0.09 to -0.03) | 18992.78 (16325.12 to 21583.07) | 141.42 (121.56 to 160.71) | 438.63 (379.03 to 498.93) | -0.31 (-0.33 to -0.29) |
| Guinea-Bissau | 329.67 (282.82 to 376.03) | 15.97 (13.7 to 18.22) | 77.05 (66.66 to 89.04) | -0.03 (-0.06 to 0.01) | 1865.98 (1596.08 to 2141.92) | 90.41 (77.33 to 103.78) | 431.13 (370.44 to 493.27) | -0.19 (-0.22 to -0.16) |
| Liberia | 1101.31 (956.03 to 1253.33) | 20.17 (17.51 to 22.96) | 75.16 (64.95 to 86.14) | -0.03 (-0.06 to 0) | 6138.3 (5305.31 to 6972.3) | 112.43 (97.18 to 127.71) | 419.94 (360.58 to 478.03) | -0.27 (-0.3 to -0.24) |
| Mali | 4711.81 (4071.99 to 5355.18) | 19.55 (16.89 to 22.22) | 78.55 (68.4 to 89.84) | -0.04 (-0.07 to -0.01) | 26749.24 (23197.13 to 30488.83) | 110.97 (96.24 to 126.49) | 439.59 (379.27 to 499.83) | -0.21 (-0.23 to -0.18) |
| Mauritania | 1315.96 (1142.1 to 1500.38) | 29.93 (25.98 to 34.13) | 77.53 (67.33 to 88.83) | -0.07 (-0.1 to -0.04) | 7418.17 (6367.48 to 8435.7) | 168.74 (144.84 to 191.88) | 433.09 (374.33 to 493.21) | -0.03 (-0.06 to 0.01) |
| Niger | 4296.21 (3711.95 to 4924.3) | 17.16 (14.83 to 19.67) | 78.36 (68.05 to 90.06) | -0.06 (-0.09 to -0.03) | 24494.63 (20964.14 to 27909.69) | 97.83 (83.73 to 111.47) | 439.52 (380.44 to 501.25) | -0.04 (-0.07 to -0.01) |
| Nigeria | 45312.4 (39635.11 to 51186) | 19.6 (17.15 to 22.14) | 68.83 (59.58 to 78.6) | -0.09 (-0.1 to -0.08) | 253561.46 (218392.19 to 289157.75) | 109.69 (94.47 to 125.09) | 377.62 (326.26 to 432.75) | -0.29 (-0.31 to -0.28) |
| São to mé and Príncipe | 60.23 (51.85 to 69.5) | 27.8 (23.93 to 32.08) | 73.4 (63.08 to 84.79) | -0.07 (-0.11 to -0.03) | 338.95 (289.13 to 389.59) | 156.47 (133.47 to 179.85) | 410.94 (351.44 to 470.85) | -0.21 (-0.25 to -0.18) |
| Senegal | 4513.22 (3918.62 to 5166.9) | 28.46 (24.71 to 32.58) | 76.64 (66.53 to 88.26) | -0.07 (-0.1 to -0.04) | 25540.85 (21898.42 to 29102.35) | 161.04 (138.08 to 183.5) | 429.79 (370.45 to 490.06) | 0.11 (0.07 to 0.14) |
| Sierra Leone | 2200.86 (1908.4 to 2531.31) | 24.82 (21.52 to 28.55) | 79.15 (68.54 to 91.02) | -0.06 (-0.08 to -0.02) | 12378.41 (10651.21 to 14089.75) | 139.6 (120.12 to 158.9) | 442.53 (380.65 to 506.69) | -0.25 (-0.27 to -0.22) |
| Togo | 1900.01 (1633.77 to 2157.63) | 22.7 (19.52 to 25.78) | 78.26 (67.73 to 90) | -0.03 (-0.06 to 0) | 10754.4 (9193.23 to 12323.92) | 128.47 (109.82 to 147.22) | 438.21 (378.97 to 499.37) | 0.23 (0.19 to 0.28) |

**GBD=Global Burden of Diseases, Injuries, and Risk Factors Study, ADOD=Alzheimer’ s Disease and Other Dementias, ASIR=Age-Standardized Incidence Rate, ASPR=Age-Standardized Prevalence Rate**
